# Supplementary material for: X-ray irradiation induced reduction and nanoclustering of lead in borosilicate glass
Source: Royal Society of Chemistry journal article supplement (doi:10.1039/c4ce00937a), 2014-01-01
Supplement: c4ce00937a1.pdf [file c4ce00937a1.pdf]

† Electronic Supplementary Information (ESI) available: [SEM and EXAFS characterisation]

## Scanning Electron Microscopy

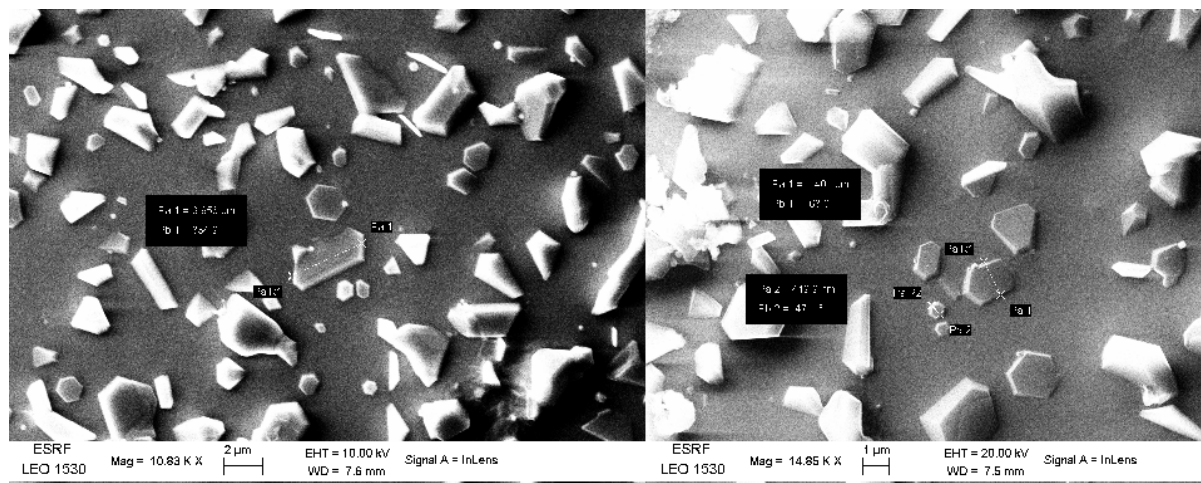

**Figure S1** SEM images of the surface of a sample pre-annealed ex-situ followed by in-situ anneal at 650°C for 2 hours 10 minutes coated with 200Å of tungsten.

## EXAFS characterisation

Pb L-III edge (13.035 KeV) Extended X-ray Absorption Fine Structure (EXAFS) spectra of our glass samples together with Pb foil, PbS and PbO pellets (diluted with Boron Nitride) were collected at the Dutch-Belgian Beamline (DUBBLE) at the European Synchrotron Radiation Facility (ESRF). The energy of the X-ray beam was tuned by a double-crystal monochromator operating in fixed-exit mode using a Si(111) crystal pair. The samples were measured in a closed-cycle He-cryostat (Oxford Instruments) at 80 K to minimize the noise induced by thermal Debye-Waller factor. EXAFS spectra of the glass samples were collected in fluorescence mode using a 9-element Ge detector, whereas reference spectra of the metallic Pb foil, PbO and PbS pellets were collected in transmission mode using Ar/He-filled ionization chambers. Due to the low concentration of Pb present in the glass samples, 25 scans were collected in fluorescence mode per sample in order to improve the signal/noise ratio.

The EXAFS spectra, were energy-calibrated, averaged and further analyzed using the program Viper<sup>1</sup>

The isolated EXAFS oscillations were  $k^3$  – weighted and Fourier transformed over the  $k$  -range from 3 to 12 Å<sup>-1</sup> using a Bessel window function. The data were fitted using Viper code which involved the theoretical phase and amplitude functions calculated by *ab initio* code FEFF 8.2. The global fit parameters that were allowed to vary during the fitting procedure were the coordination number (N), distance R (Å), Debye-Waller factor ( $\sigma^2$ ) and the energy shift ( $\Delta E_{k=0}$ ). The threshold energy  $E_{k=0}$  was defined at 13035 eV. The results are shown in Figure S2 below

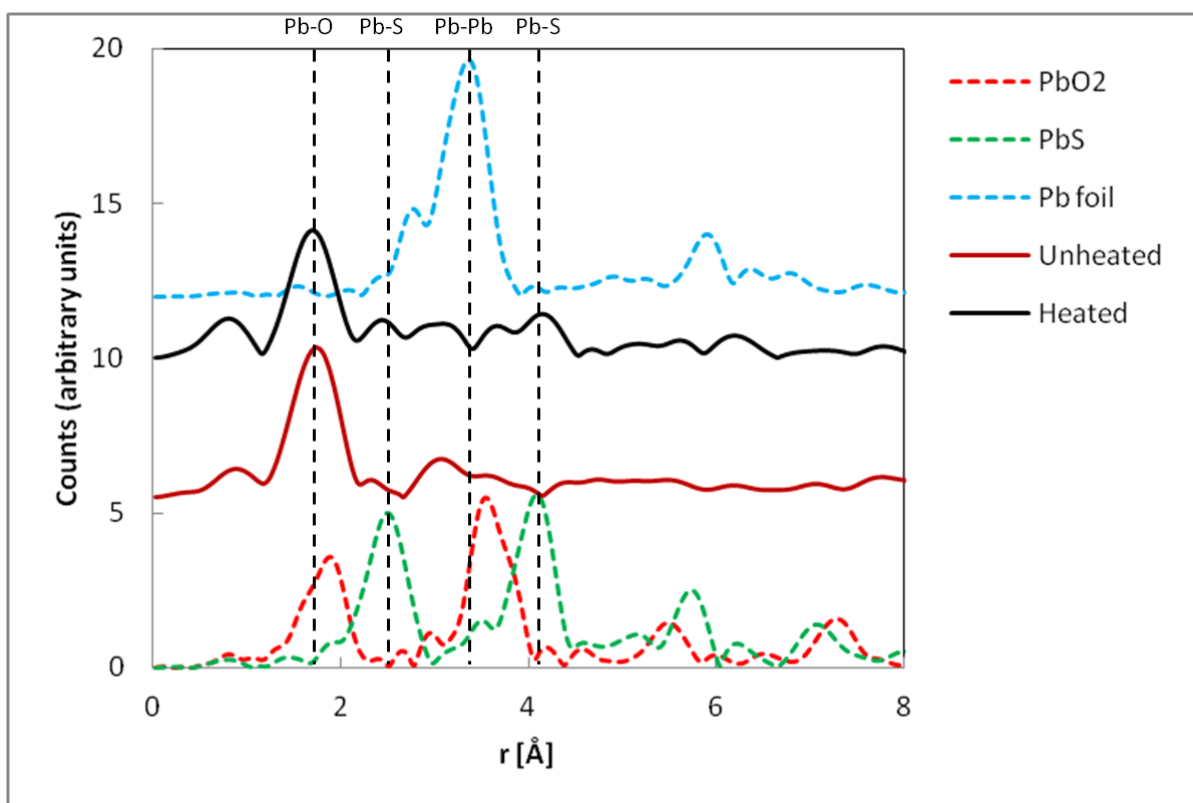

**Figure S2** Fourier transform EXAFS plots, uncorrected for phase shifts, for both unheated and annealed glass samples (solid lines) compared to three reference materials (Pb foil, PbO<sub>2</sub>, PbS) (dashed lines). The vertical dashed reference lines indicate the Pb-O, Pb-S and Pb-Pb contributions to the spectra. No evidence for Pb-Pb interaction is found in the glass samples. The unheated glass only shows Pb-O contributions whereas the heated sample shows possible Pb-S contributions.

1. K. K.V., J. Phys. D: Appl. Phys. 34, 209-17, 2001.
